# Supplementary material for: Mixed Acinar Neuroendocrine Carcinoma of the Pancreas: Comparative Population-Based Epidemiology of a Rare and Fatal Malignancy in The United States
Source: MDPI journal article supplement (doi:10.3390/cancers15030840), 2023-01-30
Supplement: s1 [file s1]

**Supplementary Materials:** The following supporting information can be downloaded at: [www.mdpi.com/xxx/s1](http://www.mdpi.com/xxx/s1), **Table S1.** pancreatic cancer subtypes specific ICD-O-3 histology and behavior codes. **Table S2.** United States CSS in months between 2001 and 2017 for MANEC-P patients compared to other pancreatic cancer histological subtypes. **Table S3.** MANEC-P CSS by Historical Staging. **Figure S1.** MANEC-P incidence rate distribution by sex and age groups. **Figure S2.** MANEC-P incidence rate by grade and sex. **Figure S3.** United States Annual Percentage Change (APC) of the age-adjusted incidence rate per 100,000 before and after 2010 for each year of patients diagnosed with mixed pancreatic endocrine and exocrine tumor, malignant. The (\*) indicates that the APC is significantly different from zero at the  $\alpha = 0.05$  level. The overall APC is  $-0.71$ . **Figure S4.** United States Temporal Trend over the time between 2001 and 2017 shows the age-adjusted incidence rate per 100,000 for each year of patients diagnosed with pancreatic cancer histological subtypes compared to the mixed pancreatic endocrine and exocrine tumor, malignant (MANEC-P)[light blue line]. The Y-axis is not proportionate to show the pancreatic cancer histological subtypes with an age-adjusted incidence rate below 0.1. **Figure S5.** United States temporal trends between 2001 and 2017 shows the age-adjusted incidence rate per 100,000 for each year of patients diagnosed with pancreatic cancer with neuroendocrine components including the functional PNET histological subtypes in comparison to MANEC-P [light blue line]. The Y-axis is not proportionate to show the pancreatic cancer histological subtypes, with an age-adjusted incidence rate below 0.1. **Figure S6.** MANEC-P age-adjusted incidence rate by the United States of America regional map between 2001 and 2017. **Figure S7.** United States CSS over the time between 2001 and 2017 for MANEC-P patients compared with pancreatic neuroendocrine tumors subtypes.

**Table S1.** Pancreatic cancer subtypes specific ICD-O-3 histology and behavior codes.

| ICD-O-3<br>Code | Diagnosis                                                                                                                                   | Solid Tumor Main Site                                     |
|-----------------|---------------------------------------------------------------------------------------------------------------------------------------------|-----------------------------------------------------------|
| 8453/3          | Intraductal papillary-mucinous neoplasm (IPMN)                                                                                              |                                                           |
| 8470/3          | Mucinous cystadenocarcinoma, NOS                                                                                                            |                                                           |
| 8471/3          | Papillary mucinous cystadenocarcinoma                                                                                                       |                                                           |
| 8140/3          | Adenocarcinoma, NOS (PDAC)                                                                                                                  |                                                           |
| 8147/3          | Basal cell adenocarcinoma                                                                                                                   |                                                           |
| 8070/3          | Squamous cell carcinoma, NOS                                                                                                                |                                                           |
| 8560/3          | Adenosquamous carcinoma                                                                                                                     |                                                           |
| 8244/3          | Mixed Adenocarcinoma with neuroendocrine carcinoma (Composite carcinoid)                                                                    | Colon and then others                                     |
| 8574/3          | Adenocarcinoma with neuroendocrine differentiation                                                                                          | Colon and then others                                     |
| 8255/3          | Adenocarcinoma with mixed subtypes (3 tumors: adenocarcinoma with two or more of the following: papillary, clear cell, mucinous, or signet) | Breast, Colon, Lung, and then others                      |
| 8150/3          | Pancreatic endocrine tumor, malignant (PNET)                                                                                                |                                                           |
| 8151/3          | Insulinoma, malignant                                                                                                                       |                                                           |
| 8152/3          | Glucagonoma, malignant                                                                                                                      |                                                           |
| 8153/3          | Gastrinoma, malignant                                                                                                                       |                                                           |
| 8154/3          | Mixed pancreatic endocrine and exocrine tumor, malignant                                                                                    |                                                           |
| 8155/3          | Vipoma, malignant                                                                                                                           |                                                           |
| 8156/3          | Somatostatinoma, malignant                                                                                                                  |                                                           |
| 8240/3          | Carcinoid tumor, NOS                                                                                                                        | We combined it with 8150/3 (PNET) as it probably has been |

|        |                                      |                           |
|--------|--------------------------------------|---------------------------|
|        |                                      | used interchangeably      |
| 8013/3 | Large cell neuroendocrine carcinoma  | Esophagus and then others |
| 8041/3 | Small cell carcinoma, NOS            | Esophagus and then others |
| 8246/3 | Neuroendocrine carcinoma, NOS (PNEC) |                           |
| 8550/3 | Acinar cell carcinoma                |                           |
| 8551/3 | Acinar cell cystadenocarcinoma       |                           |

**Table S2.** United States CSS in months between 2001 and 2017 for MANEC-P patients compared to other pancreatic cancer histological subtypes.

| Group                                                                   | Median Time | Lower 95% | Upper 95% |
|-------------------------------------------------------------------------|-------------|-----------|-----------|
| <b>8154/3: Mixed pancreatic endocrine and exocrine tumor, malignant</b> | <b>29</b>   | <b>21</b> | <b>51</b> |
| 8151/3: Insulinoma, malignant                                           | .           | .         | .         |
| 8156/3: Somatostatinoma, malignant                                      | .           | .         | .         |
| 8153/3: Gastrinoma, malignant                                           | 150         | 82        | .         |
| 8150/3: Pancreatic endocrine tumor, malignant                           | 135         | 111       | .         |
| 8152/3: Glucagonoma, malignant                                          | 126         | 64        | .         |
| 8453/3: Intraductal papillary-mucinous neoplasm (IPMN)                  | 69          | 54        | 128       |
| 8246/3: Neuroendocrine carcinoma, NOS                                   | 66          | 60        | 71        |
| 8155/3: Vipoma, malignant                                               | 46          | 16        | 193       |
| 8244/3: Mixed adenoneuroendocrine carcinoma (ICD-O-3 update)            | 32          | 6         | 32        |
| 8470/3: Mucinous cystadenocarcinoma, NOS                                | 28          | 20        | 39        |
| 8550/3: Acinar cell carcinoma                                           | 16          | 13        | 20        |
| 8255/3: Adenocarcinoma with mixed subtypes                              | 14          | 10        | 19        |
| 8574/3: Adenocarcinoma with neuroendocrine differentiation              | 10          | 5         | 15        |
| 8013/3: Large cell neuroendocrine carcinoma                             | 9           | 8         | 13        |
| 8560/3: Adenosquamous carcinoma                                         | 6           | 5         | 6         |
| 8041/3: Small cell carcinoma, NOS                                       | 5           | 3         | 6         |
| 8140/3: Adenocarcinoma, NOS                                             | 5           | .         | .         |
| 8070/3: Squamous cell carcinoma, NOS                                    | 3           | 2         | 4         |
| Combined                                                                | 6           | .         | .         |

**Table S3.** MANEC-P Cancer-Specific Survival by Historical Staging.

| MANEC-P<br>Characteristics (n) | Tumor | Median<br>months | survival, | Survival Rate, % |        |        |         |
|--------------------------------|-------|------------------|-----------|------------------|--------|--------|---------|
|                                |       |                  |           | 1-year           | 3-year | 5-year | 10-year |
| All (145)                      |       | 29.22            |           | 70               | 45.5   | 37.9   | 26.8    |
| Localized only (17)            |       | 15               |           | 94.1             | 87.8   | 87.8   | 58.2    |
| Regional (56)                  |       | 33.89            |           | 78.1             | 51.7   | 41.9   | 36.3    |
| Distant (49)                   |       | 12.24            |           | 52.3             | 22.4   | 18.7   | 12.5    |
| Unknown (23)                   |       | 32.13            |           | 68.3             | 45.5   | 30.3   | 20.2    |

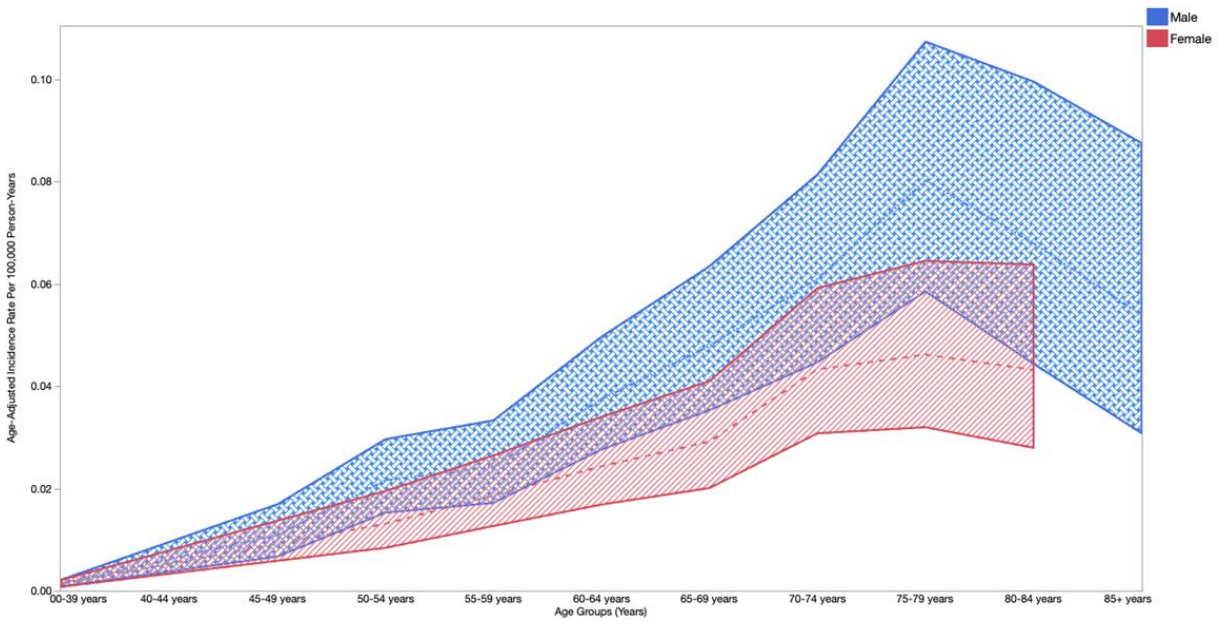

**Figure S1.** MANEC-P incidence rate distribution by sex and age groups.

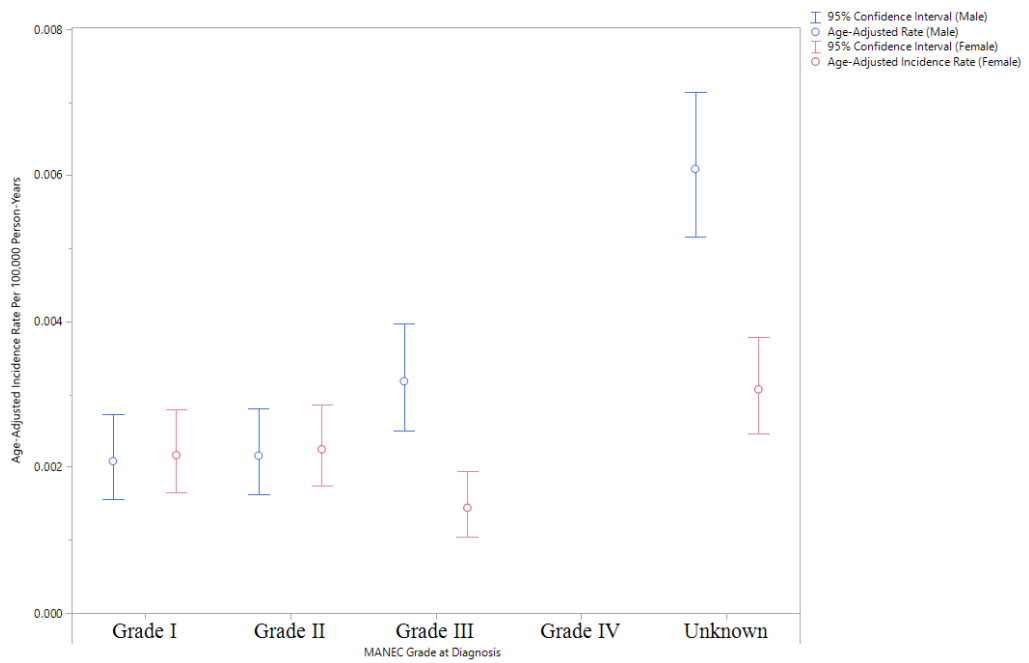

**Figure S2.** MANEC-P incidence rate by grade and sex.

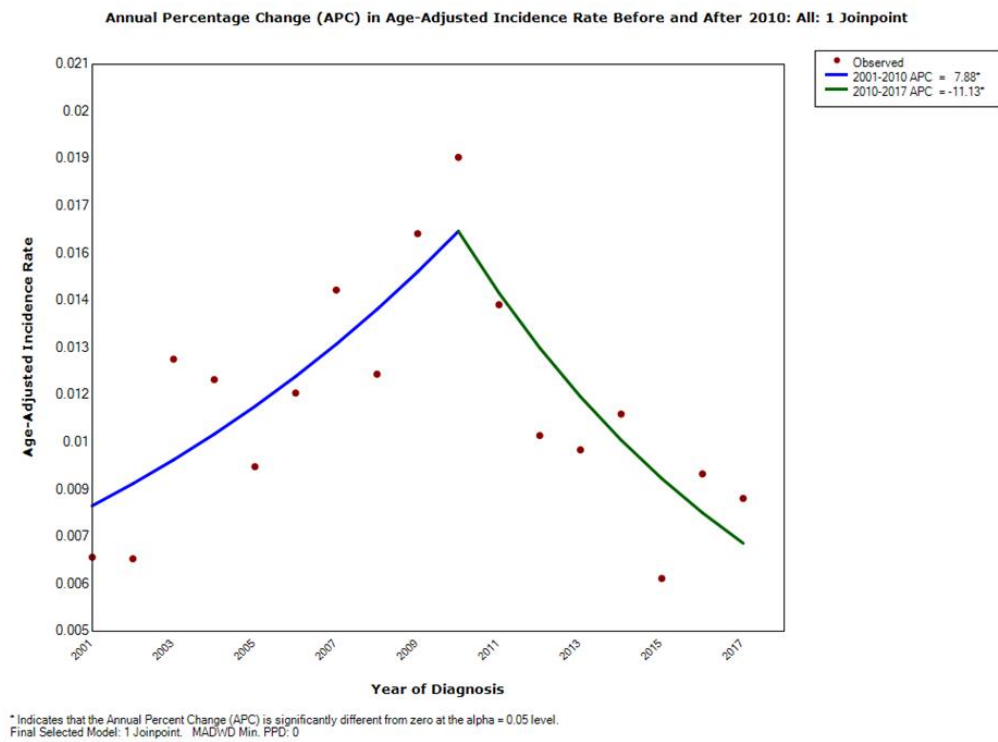

**Figure S3.** United States Annual Percentage Change (APC) of the age-adjusted incidence rate per 100,000 before and after 2010 for each year of patients diagnosed with mixed pancreatic endocrine and exocrine tumor, malignant. The (\*) indicates that the APC is significantly different from zero at the alpha = 0.05 level. The overall APC is –0.71.

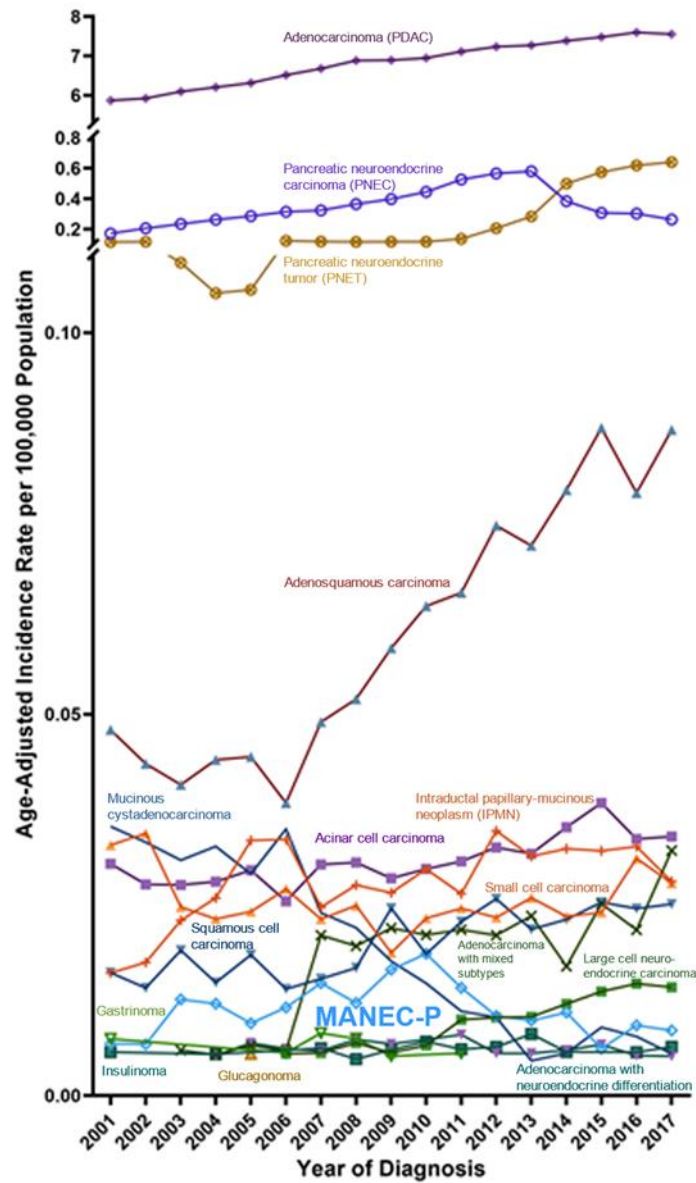

**Figure S4.** United States Temporal Trend over the time between 2001 and 2017 shows the age-adjusted incidence rate per 100,000 for each year of patients diagnosed with pancreatic cancer histological subtypes compared to the mixed pancreatic endocrine and exocrine tumor, malignant (MANEC-P)[light blue line]. The Y-axis is not proportionate to show the pancreatic cancer histological subtypes with an age-adjusted incidence rate below 0.1.



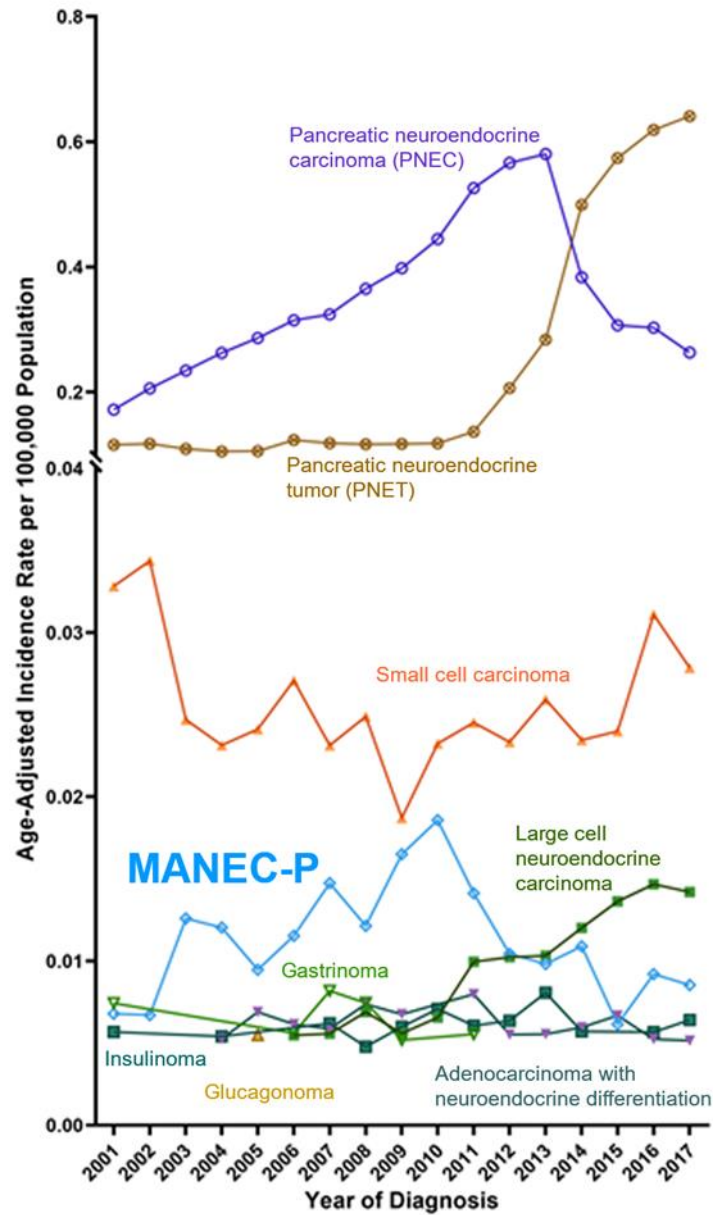

**Figure S5.** United States temporal trends between 2001 and 2017 shows the age-adjusted incidence rate per 100,000 for each year of patients diagnosed with pancreatic cancer with neuroendocrine components including the functional PNET histological subtypes in comparison to MANEC-P [light blue line]. The Y-axis is not proportionate to show the pancreatic cancer histological subtypes, with an age-adjusted incidence rate below 0.1.

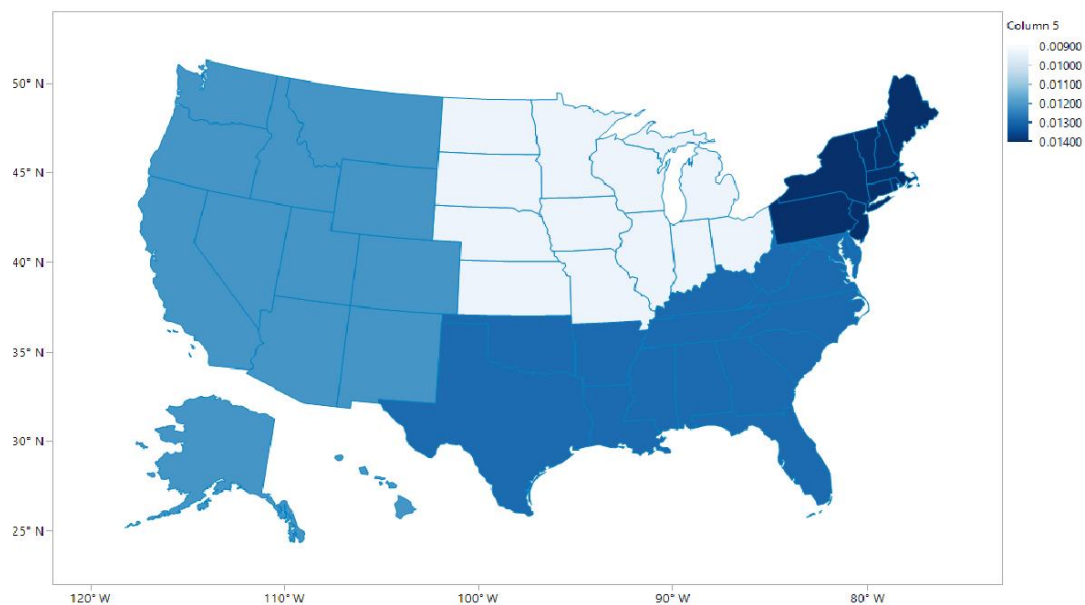

**Figure S6.** MANEC-P age-adjusted incidence rate by the United States of America regional map between 2001 and 2017.

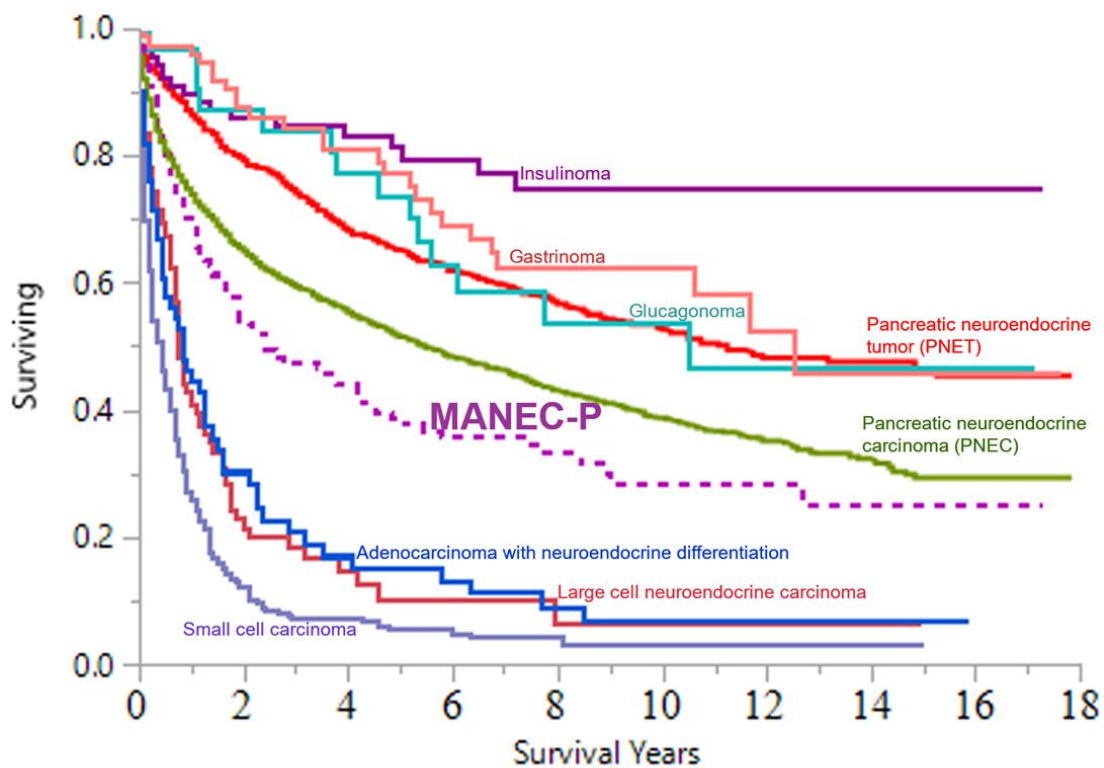

**Figure S7.** United States CSS over the time between 2001 and 2017 for MANEC-P patients compared with pancreatic neuroendocrine tumors subtypes.
